# Supplementary material for: Hydrogen tunnelling in the rearrangements of carbenes: the role of dynamical calculations
Source: Royal Society of Chemistry journal article supplement (doi:10.1039/c9cp06300e), 2019-12-17
Supplement: c9cp06300e1.pdf [file c9cp06300e1.pdf]

## Computational Methods

The electronic structure calculations were performed using Gaussian 09. The cc-pVTZ basis set was used with either MP2 (for the methylhydroxycarbene calculations) or M06-2X (for the Phenyl Pyruvic Acid Derivative calculations) methods, and no normal mode scaling was used.

For the methylhydroxycarbene calculations, the barrier heights were corrected using single point energy calculations at the CCSD(T) level of theory.

1D-SCTST calculations were performed using the in-house *pySCTST* code, available at [bitbucket.org/timothyburd/pysctst](http://bitbucket.org/timothyburd/pysctst), along with tutorials on running 1D and FD SCTST calculations.

8 single point energies were calculated along the reaction mode away from the TS with a step size of  $\Delta Q = 0.02 \text{ a}_0 \text{ Da}^{0.5}$  in order to determine the anharmonicity of the reaction path, calculated using Richardson extrapolation. Full details of the 1D-SCTST method can be found in reference 12. Reaction coordinates are given in atomic units, and refer to mass-weighted coordinates (in contrast to the reaction coordinates used in ref. 7). The atomic unit is thus  $m_e^{0.5} \text{ a}_0$ .

For the methylhydroxycarbene calculations, the methane group was treated as a hindered rotor, via the 'tanh' approximation, discussed in ref. 10, but its anharmonic treatment had a negligible effect on the rates.

# Optimised Geometries

Phenyl Pyruvic Acid Derivative structures have been optimised at M06-2X/cc-pVTZ level of theory

Methylhydroxycarbene decay structures have been optimised at MP2/cc-pVTZ level of theory.

Coordinates are in Angstroms

## Phenyl Pyruvic Acid Derivative Carbene reactant

|   |                     |                      |                       |
|---|---------------------|----------------------|-----------------------|
| C | -3.114536302914145  | 0.44561854408777096  | -0.4401657767215406   |
| C | -3.8673730678063194 | -0.6588707257334379  | 0.25608440029427987   |
| O | -5.063375021819029  | -0.20866259702840492 | 0.49346192378487996   |
| H | -5.591410313030114  | -0.9039806395050547  | 0.9078812629147156    |
| H | -3.471244578001133  | 1.4418952193888728   | -0.166726143098634    |
| H | -3.381972420053937  | 0.2958888235951704   | -1.4964333019668572   |
| C | -1.6245585183760336 | 0.31852631598512887  | -0.2949062574097229   |
| C | -1.008643043404537  | -0.9307585196766696  | -0.3791445605438571   |
| C | -0.8285444017559481 | 1.4319729297762174   | -0.07538151923826782  |
| C | 0.3611366670349208  | -1.0562096131500274  | -0.2558546220253765   |
| H | -1.6192921891361942 | -1.8105894958231343  | -0.5248618467161641   |
| C | 0.5520863847311405  | 1.3240849738313198   | 0.051692930256470204  |
| H | -1.2833753024268428 | 2.410409088202565    | 0.0027785015631488007 |
| C | 1.138261687854815   | 0.07578589106011543  | -0.040483756340862986 |
| H | 0.8014546986227471  | -2.0411503596076175  | -0.32626733502969935  |
| H | 1.1236505442140943  | 2.2220144031698577   | 0.22251325110749606   |
| C | 2.9172554360749587  | -1.0015649384070355  | 1.2597690246842876    |
| H | 2.4603241834395635  | -1.969879550834827   | 1.0902857201623553    |
| H | 3.995851134286019   | -1.1058053869844027  | 1.3464505003578218    |
| H | 2.5008054725446116  | -0.545270942132602   | 2.1531249659178764    |
| C | 3.170595854633483   | -0.7163884040823311  | -1.1626914076671948   |
| H | 2.936524101161259   | -0.05619320441923054 | -1.9928137153137293   |
| H | 4.246097681255566   | -0.8256633864071175  | -1.0482018337581953   |
| H | 2.710957389611452   | -1.6857700282652455  | -1.3181207815648863   |
| C | 3.3370672518241857  | 1.1878074015253137   | 0.3198339726631214    |
| H | 3.1603774692058635  | 1.8469045039765617   | -0.5244321669943438   |
| H | 2.9801790776535664  | 1.6368956764267644   | 1.2413969657085904    |
| H | 4.397150151089309   | 0.9666850641334763   | 0.40188125090569565   |
| N | 2.620633629549431   | -0.10387316255261064 | 0.09304781774671875   |

## Phenyl Pyruvic Acid Derivative Decay - Aldehyde-pathway TS

|   |                     |                      |                      |
|---|---------------------|----------------------|----------------------|
| C | -3.1196411008112426 | 0.403843173816824    | -0.5809649819995297  |
| C | -3.885283615463604  | -0.5794154082566595  | 0.261848282582992    |
| O | -4.9988187680100715 | -0.1715175453194831  | 0.7481849956028459   |
| H | -4.656879236119891  | -1.2920348852610848  | 0.9337983569809373   |
| H | -3.4971823946468197 | 1.4093893769482475   | -0.3784230956846089  |
| H | -3.3836671259378734 | 0.14960657566452684  | -1.6145191588896526  |
| C | -1.6332929004086263 | 0.29473296563271034  | -0.40076503043282363 |
| C | -1.0015176193810962 | -0.9458664284214001  | -0.4918020763911663  |
| C | -0.8594093291758302 | 1.4114765841509014   | -0.12676114785327963 |
| C | 0.36433376416350755 | -1.0609629050867107  | -0.3227077478093922  |
| H | -1.5915998537067508 | -1.830661219073207   | -0.6872876740973399  |
| C | 0.5171007390464235  | 1.3137890110250074   | 0.04422775504468988  |
| H | -1.3278532500212599 | 2.3826309625641597   | -0.04178261364856997 |
| C | 1.1205387229342223  | 0.0741655673828901   | -0.0555720069989998  |
| H | 0.8175596460203867  | -2.039334413933556   | -0.4003583339355013  |
| H | 1.0724348531105894  | 2.2135921616051757   | 0.2540396823171878   |
| C | 2.868239174784608   | -1.0122741409868472  | 1.2792213830548007   |
| H | 2.4300430284402306  | -1.9821734803994362  | 1.0730324952657604   |
| H | 3.944609206576541   | -1.1054390693539369  | 1.39924442015001     |
| H | 2.4171395608168145  | -0.5812068054000414  | 2.1683104837919323   |
| C | 3.198074323094313   | -0.6695407321574529  | -1.1272395933754569  |
| H | 2.9827286640252546  | 0.0058005495066316   | -1.950246552532591   |
| H | 4.270546689577177   | -0.7674416695336126  | -0.9794216663078938  |
| H | 2.7574213921852144  | -1.6413388546442436  | -1.3185843619661826  |
| C | 3.292664368016723   | 1.2027933296318278   | 0.4023652437886134   |
| H | 3.1366646204653885  | 1.8787125204329973   | -0.4326442863125317  |
| H | 2.9006712605059826  | 1.6268903536184018   | 1.321538721276042    |
| H | 4.3518828510208065  | 0.9912454272149671   | 0.5147375500544812   |
| N | 2.599313016337846   | -0.09179188972833986 | 0.12314079733088668  |

## Phenyl Pyruvic Acid Derivative Decay - Enol-pathway TS

|   |                     |                      |                         |
|---|---------------------|----------------------|-------------------------|
| C | -3.0806166418515906 | 0.5013696982095898   | 0.04581255547928395     |
| C | -3.939787222146487  | -0.5860374048350416  | -0.08954397722856557    |
| O | -5.2216471938875895 | -0.23105875656512337 | 0.08140727068930799     |
| H | -5.779384164596387  | -0.9870174071584887  | -0.12066780089322117    |
| H | -3.457456151457462  | 1.497129090618796    | 0.291185592351541       |
| H | -3.378493857801833  | -0.10533375567713281 | -1.1348049171201362     |
| C | -1.6099690868761574 | 0.33545483880524946  | 0.02862659704931935     |
| C | -1.0152045285691844 | -0.9292785433201957  | 0.06076997818546413     |
| C | -0.7891705852953462 | 1.4552048940206936   | 0.0001416343590977812   |
| C | 0.3579606142255419  | -1.0607210869779709  | 0.03467601759143665     |
| H | -1.6476788473967103 | -1.8039417071476342  | 0.11320433317753789     |
| C | 0.5951178581781221  | 1.3365842823621261   | -0.012467016232536052   |
| H | -1.2294726399649087 | 2.4432950915494165   | -0.012372286738835789   |
| C | 1.160438446287679   | 0.07480868861484827  | -4.0788798849047516e-05 |
| H | 0.7836543256601685  | -2.054187931319085   | 0.05929215187598624     |
| H | 1.1872020333829056  | 2.2370891272118745   | -0.033395525590404186   |
| C | 3.0674717635858846  | -0.8420705204493854  | 1.240475572937565       |
| H | 2.591477923344301   | -1.8157742259375003  | 1.263836629961933       |
| H | 4.148622096519197   | -0.9537340181872888  | 1.2225308139737836      |
| H | 2.7549372756176997  | -0.25404000194022147 | 2.098575199107139       |
| C | 3.0495534899413634  | -0.9139217043250498  | -1.2117629203498324     |
| H | 2.7285957761388904  | -0.37483454553735357 | -2.098416202523224      |
| H | 4.130430449929023   | -1.0287448186282517  | -1.2005251279487217     |
| H | 2.5705728518270696  | -1.8856511343184699  | -1.173600665690491      |
| C | 3.391273736088321   | 1.1803743244566858   | -0.048868422407865486   |
| H | 3.1223544251946302  | 1.7161963101138722   | -0.9539228974081403     |
| H | 3.14583798674265    | 1.763539265446578    | 0.8331940543364447      |
| H | 4.452492879362689   | 0.9499428444995586   | -0.056263462747959486   |
| N | 2.646725452637962   | -0.1151524191630315  | -0.00514620479122401    |

## Phenyl Pyruvic Acid Derivative Decay - Aldehyde product

|   |                      |                      |                      |
|---|----------------------|----------------------|----------------------|
| C | 3.2248453821717167   | 0.6900533076477382   | -0.5137507038837755  |
| H | 3.5625659164768155   | 0.5391668407041453   | -1.544388790501367   |
| H | 3.515140943968642    | 1.7081852127809458   | -0.2500307612043781  |
| C | 4.030309577122899    | -0.27282472282790693 | 0.3442569280032513   |
| O | 3.5582623140397187   | -1.2054770518422     | 0.9262604975333534   |
| H | 5.111926226303672    | -0.05925887192137512 | 0.38541722290508684  |
| C | 1.7453461742026264   | 0.4883672850318218   | -0.3952558215547653  |
| C | 0.9183851235707349   | 1.492910230619788    | 0.0952603304079867   |
| C | 1.1724053496295161   | -0.730458548696225   | -0.7373514046285218  |
| C | -0.44341169309345135 | 1.291158181505275    | 0.24128078379028844  |
| H | 1.3395461136541624   | 2.4494886080507094   | 0.3740215790595385   |
| C | -0.18957206251550746 | -0.9514948524575855  | -0.5973986172363742  |
| H | 1.7956260683315042   | -1.532274479556469   | -1.1071112957900773  |
| C | -0.9904607473756285  | 0.06458993911330957  | -0.10362547216439372 |
| H | -1.0510260683926076  | 2.097005246749989    | 0.6283011479886568   |
| H | -0.5827454092993898  | -1.9168742988328518  | -0.8717164934624115  |
| C | -2.923935123552557   | -1.489619425732854   | -0.32573677719836364 |
| H | -3.995818759224433   | -1.539823515226686   | -0.1586613157578935  |
| H | -2.7058813048696613  | -1.6370160060320915  | -1.3788864173221815  |
| H | -2.419416710886508   | -2.234823349160381   | 0.2812832680657663   |
| C | -3.217671152134382   | 0.8759752428393585   | -0.7399060605178626  |
| H | -4.282014335390355   | 0.7083045713421653   | -0.5961031702641019  |
| H | -2.9506580910052977  | 1.8760477427666715   | -0.41796536618418784 |
| H | -2.9427110241145393  | 0.7339773442914534   | -1.7810676889501933  |
| C | -2.8135444028353356  | 0.05252733502592438  | 1.5354607878201392   |
| H | -2.2472733383754013  | -0.67267617590789    | 2.1127673349427933   |
| H | -2.5515785016218526  | 1.0584610716662723   | 1.8432650877285417   |
| H | -3.8819931122076787  | -0.10938311915806392 | 1.6533749690731152   |
| N | -2.465137955039349   | -0.12739917945885126 | 0.08543041026451945  |

## Phenyl Pyruvic Acid Derivative Decay - Enol Product

|   |                     |                       |                       |
|---|---------------------|-----------------------|-----------------------|
| C | -3.0579104469138945 | -0.5128353680750728   | -0.09683088232291359  |
| H | -3.408983905504024  | -1.5249468516300795   | -0.25305111049960677  |
| C | -3.9756413804530113 | 0.43642553792761196   | 0.09537903385175363   |
| H | -3.716209063292447  | 1.4696708526026274    | 0.299681786960218     |
| O | -5.284442070776174  | 0.14654516645137505   | 0.057028548742817514  |
| H | -5.82013969978948   | 0.9216392247265218    | 0.24238679855152695   |
| C | -1.6198192337600459 | -0.297365349187071    | -0.07271814494989784  |
| C | -0.7687479170127003 | -1.4091807700010817   | -0.015712571388084615 |
| C | -1.0176421145847991 | 0.9633012457686922    | -0.11644393011523073  |
| C | 0.6039231393730427  | -1.2723723800377307   | 0.01572322414862342   |
| H | -1.198212030871289  | -2.40139080259788     | 0.009084730629535104  |
| C | 0.3581055473959777  | 1.1164408434285076    | -0.07875459054313447  |
| H | -1.6233774530572704 | 1.8542254166441818    | -0.19935441068632992  |
| C | 1.169939759556054   | -0.004849345288880193 | -0.011243715587435386 |
| H | 1.212286911621194   | -2.1651320973110657   | 0.062183635937522734  |
| H | 0.7592266643471278  | 2.1166753403745058    | -0.11567565847358052  |
| C | 3.13319225487839    | 1.522675469591953     | -0.013399802770944661 |
| H | 2.7415937230610226  | 2.0507225667465483    | 0.8504201589011297    |
| H | 4.21866735733712    | 1.5114301628744886    | 0.019438117153491346  |
| H | 2.7953901902408553  | 1.9865384885597495    | -0.9348414975522072   |
| C | 3.18714789856239    | -0.5165273358532648   | 1.2859808334129608    |
| H | 2.9091219770962264  | -1.564103297968951    | 1.3093128915263303    |
| H | 4.269595784593262   | -0.41570604091956853  | 1.2952846736226264    |
| H | 2.7437894168830885  | 0.004337152563131705  | 2.1296110719322936    |
| C | 3.2521999596646105  | -0.6022205117063028   | -1.1626900159311377   |
| H | 2.9768358154300034  | -1.6500939857151617   | -1.1256438859635933   |
| H | 2.8523967574916296  | -0.1446524197015853   | -2.062889197442001    |
| H | 4.333595100557887   | -0.4973209247612457   | -1.1234830331689019   |
| N | 2.663067746596934   | 0.10497052949991605   | 0.023652848882346495  |

## Methylhydroxycarbene

|   |                     |                       |                         |
|---|---------------------|-----------------------|-------------------------|
| C | 1.1086313202776528  | -0.372888156623166    | -1.5654270400465353e-31 |
| C | 0.0                 | 0.6266203488817468    | 0.0                     |
| O | -1.1333557388771678 | -0.048479062390889845 | 0.0                     |
| H | -1.844475395379819  | 0.6054596424388753    | -3.1308540853848427e-31 |
| H | 0.7882924421775306  | -1.4157841236664261   | -4.174472112082533e-31  |
| H | 1.7356204792145151  | -0.16211807696738256  | 0.8673574491292323      |
| H | 1.7356204792145151  | -0.16211807696738256  | -0.8673574491292323     |

## Methylhydroxycarbene decay – Aldehyde pathway TS

|   |                         |                      |                         |
|---|-------------------------|----------------------|-------------------------|
| C | 1.1084376943372454      | -0.4508023116287953  | 3.913567608053996e-32   |
| C | -1.4687618002440926e-17 | 0.5388877314775579   | -5.218090144071995e-32  |
| O | -1.2176793861238764     | 0.038803765181714155 | -7.827135226691537e-32  |
| H | -1.0879962138048551     | 1.1898371877091276   | 0.0                     |
| H | 0.7080621711384968      | -1.4667304318204268  | -2.0872360586871526e-31 |
| H | 1.735371490754607       | -0.2810246909148493  | 0.8750802189686077      |
| H | 1.735371490754607       | -0.2810246909148493  | -0.8750802189686077     |

## Methylhydroxycarbene decay – Enol pathway TS

|   |                       |                      |                       |
|---|-----------------------|----------------------|-----------------------|
| C | 1.1577267623536363    | 0.1941161691143368   | -0.025926831773532416 |
| C | -0.022160343038365515 | -0.5328089194278716  | -0.13285135150072258  |
| O | -1.11602374066139     | 0.26347573321885465  | 0.0165285165514858    |
| H | -1.8748350961521352   | -0.32499032776641695 | 0.023156318627181406  |
| H | 2.082534149857366     | -0.33959074763101726 | -0.19272840294471122  |
| H | 1.192369665781681     | 1.2773037718555385   | 0.09880866626249735   |
| H | 0.7147226653587608    | -0.6883720587402014  | 0.8912043860824418    |

## Methylhydroxycarbene decay – Aldehyde product

|   |                      |                      |                         |
|---|----------------------|----------------------|-------------------------|
| C | 1.1657086067705043   | -0.14996293682582423 | -1.1450248742040635e-07 |
| H | 1.7010629109030324   | 0.21619288924191443  | -0.8762875103097992     |
| H | 1.1446194133355219   | -1.2351516004244583  | -1.1315974841023228e-05 |
| H | 1.701047146714006    | 0.21617699646282657  | 0.8763041370576746      |
| C | -0.2279861896505409  | 0.40119036455141177  | -9.680518918193358e-07  |
| O | -1.2342176502782867  | -0.2761098496433988  | 2.2466540475806512e-07  |
| H | -0.29932274128294445 | 1.5042959439258508   | -6.124268795195286e-07  |

## Methylhydroxycarbene decay – Enol product

|   |                       |                      |                        |
|---|-----------------------|----------------------|------------------------|
| C | 1.225233147346561     | -0.18114498162525847 | -4.517313584189572e-07 |
| H | 2.115760414148962     | 0.4239374368408941   | -7.541801711948078e-07 |
| H | 1.3098197692067852    | -1.2566325649136112  | -4.689302918507202e-07 |
| C | 0.034653914335717975  | 0.4133368272451133   | -3.03010214759109e-08  |
| H | -0.062339787135591004 | 1.4921552799559947   | 0.0                    |
| O | -1.1321282805925792   | -0.2968097713281639  | 5.03819285435105e-07   |
| H | -1.8655365212556891   | 0.32186694396455023  | 8.47382443597466e-08   |

# Rate Data

Rates are given in units of  $s^{-1}$

a -> methylhydroxycarbene (Aldehyde Pathway)

b -> methylhydroxycarbene (Enol Pathway)

c -> Phenyl Pyruvic Acid Derivative (Aldehyde Pathway)

d -> Phenyl Pyruvic Acid Derivative (Enol Pathway)

e -> Deuterated Phenyl Pyruvic Acid Derivative (Enol Pathway)

| Temperature (K) | a        | b        | c        | d        | e        |
|-----------------|----------|----------|----------|----------|----------|
| 1000            | 1.25e+07 | 2.80e+07 | 3.03e+06 | 1.52e+08 | 1.09e+08 |
| 955             | 6.34e+06 | 1.59e+07 | 1.38e+06 | 9.19e+07 | 6.52e+07 |
| 913             | 3.22e+06 | 9.02e+06 | 6.30e+05 | 5.56e+07 | 3.89e+07 |
| 875             | 1.65e+06 | 5.14e+06 | 2.89e+05 | 3.36e+07 | 2.32e+07 |
| 840             | 8.43e+05 | 2.93e+06 | 1.33e+05 | 2.04e+07 | 1.39e+07 |
| 808             | 4.33e+05 | 1.67e+06 | 6.13e+04 | 1.24e+07 | 8.30e+06 |
| 778             | 2.23e+05 | 9.58e+05 | 2.84e+04 | 7.54e+06 | 4.96e+06 |
| 750             | 1.16e+05 | 5.50e+05 | 1.32e+04 | 4.59e+06 | 2.97e+06 |
| 724             | 6.00e+04 | 3.16e+05 | 6.17e+03 | 2.80e+06 | 1.78e+06 |
| 700             | 3.13e+04 | 1.82e+05 | 2.89e+03 | 1.71e+06 | 1.07e+06 |
| 677             | 1.63e+04 | 1.05e+05 | 1.36e+03 | 1.05e+06 | 6.41e+05 |
| 656             | 8.59e+03 | 6.04e+04 | 6.43e+02 | 6.42e+05 | 3.85e+05 |
| 636             | 4.53e+03 | 3.49e+04 | 3.05e+02 | 3.94e+05 | 2.31e+05 |
| 618             | 2.40e+03 | 2.02e+04 | 1.46e+02 | 2.42e+05 | 1.39e+05 |
| 600             | 1.28e+03 | 1.17e+04 | 6.99e+01 | 1.49e+05 | 8.35e+04 |
| 583             | 6.82e+02 | 6.82e+03 | 3.37e+01 | 9.19e+04 | 5.03e+04 |
| 568             | 3.67e+02 | 3.97e+03 | 1.63e+01 | 5.67e+04 | 3.03e+04 |
| 553             | 1.98e+02 | 2.32e+03 | 7.97e+00 | 3.51e+04 | 1.82e+04 |
| 538             | 1.08e+02 | 1.35e+03 | 3.91e+00 | 2.17e+04 | 1.10e+04 |
| 525             | 5.89e+01 | 7.93e+02 | 1.94e+00 | 1.35e+04 | 6.61e+03 |
| 512             | 3.24e+01 | 4.65e+02 | 9.64e-01 | 8.37e+03 | 3.99e+03 |
| 500             | 1.80e+01 | 2.73e+02 | 4.84e-01 | 5.21e+03 | 2.40e+03 |
| 488             | 1.01e+01 | 1.61e+02 | 2.45e-01 | 3.25e+03 | 1.45e+03 |
| 477             | 5.67e+00 | 9.50e+01 | 1.25e-01 | 2.03e+03 | 8.76e+02 |
| 467             | 3.22e+00 | 5.62e+01 | 6.45e-02 | 1.27e+03 | 5.29e+02 |
| 457             | 1.85e+00 | 3.33e+01 | 3.36e-02 | 7.97e+02 | 3.19e+02 |
| 447             | 1.07e+00 | 1.98e+01 | 1.77e-02 | 5.01e+02 | 1.93e+02 |
| 438             | 6.29e-01 | 1.18e+01 | 9.41e-03 | 3.15e+02 | 1.17e+02 |
| 429             | 3.73e-01 | 7.05e+00 | 5.07e-03 | 1.99e+02 | 7.05e+01 |
| 420             | 2.24e-01 | 4.22e+00 | 2.76e-03 | 1.26e+02 | 4.26e+01 |
| 412             | 1.37e-01 | 2.54e+00 | 1.53e-03 | 7.99e+01 | 2.58e+01 |
| 404             | 8.43e-02 | 1.53e+00 | 8.53e-04 | 5.08e+01 | 1.56e+01 |
| 396             | 5.28e-02 | 9.24e-01 | 4.84e-04 | 3.24e+01 | 9.44e+00 |
| 389             | 3.35e-02 | 5.60e-01 | 2.78e-04 | 2.07e+01 | 5.71e+00 |
| 382             | 2.16e-02 | 3.41e-01 | 1.62e-04 | 1.33e+01 | 3.46e+00 |



|     |          |          |          |          |          |
|-----|----------|----------|----------|----------|----------|
| 375 | 1.42e-02 | 2.08e-01 | 9.59e-05 | 8.56e+00 | 2.09e+00 |
| 368 | 9.45e-03 | 1.27e-01 | 5.75e-05 | 5.53e+00 | 1.27e+00 |
| 362 | 6.40e-03 | 7.84e-02 | 3.49e-05 | 3.58e+00 | 7.68e-01 |
| 356 | 4.40e-03 | 4.84e-02 | 2.15e-05 | 2.33e+00 | 4.66e-01 |
| 350 | 3.07e-03 | 3.00e-02 | 1.34e-05 | 1.52e+00 | 2.82e-01 |
| 344 | 2.18e-03 | 1.87e-02 | 8.49e-06 | 1.00e+00 | 1.71e-01 |
| 339 | 1.57e-03 | 1.17e-02 | 5.44e-06 | 6.61e-01 | 1.04e-01 |
| 333 | 1.15e-03 | 7.38e-03 | 3.52e-06 | 4.39e-01 | 6.29e-02 |
| 328 | 8.50e-04 | 4.67e-03 | 2.31e-06 | 2.93e-01 | 3.82e-02 |
| 323 | 6.39e-04 | 2.97e-03 | 1.53e-06 | 1.97e-01 | 2.32e-02 |
| 318 | 4.87e-04 | 1.90e-03 | 1.03e-06 | 1.33e-01 | 1.40e-02 |
| 313 | 3.75e-04 | 1.22e-03 | 6.97e-07 | 9.06e-02 | 8.53e-03 |
| 309 | 2.93e-04 | 7.92e-04 | 4.77e-07 | 6.22e-02 | 5.18e-03 |
| 304 | 2.32e-04 | 5.16e-04 | 3.30e-07 | 4.31e-02 | 3.14e-03 |
| 300 | 1.85e-04 | 3.39e-04 | 2.30e-07 | 3.01e-02 | 1.91e-03 |
| 296 | 1.49e-04 | 2.24e-04 | 1.62e-07 | 2.12e-02 | 1.16e-03 |
| 292 | 1.22e-04 | 1.49e-04 | 1.15e-07 | 1.51e-02 | 7.04e-04 |
| 288 | 1.00e-04 | 9.98e-05 | 8.23e-08 | 1.09e-02 | 4.27e-04 |
| 284 | 8.33e-05 | 6.74e-05 | 5.94e-08 | 7.94e-03 | 2.60e-04 |
| 280 | 6.99e-05 | 4.58e-05 | 4.32e-08 | 5.86e-03 | 1.58e-04 |
| 276 | 5.91e-05 | 3.14e-05 | 3.16e-08 | 4.37e-03 | 9.59e-05 |
| 273 | 5.03e-05 | 2.17e-05 | 2.33e-08 | 3.31e-03 | 5.83e-05 |
| 269 | 4.32e-05 | 1.51e-05 | 1.73e-08 | 2.53e-03 | 3.54e-05 |
| 266 | 3.73e-05 | 1.06e-05 | 1.30e-08 | 1.97e-03 | 2.15e-05 |
| 262 | 3.25e-05 | 7.48e-06 | 9.75e-09 | 1.55e-03 | 1.31e-05 |
| 259 | 2.85e-05 | 5.33e-06 | 7.37e-09 | 1.23e-03 | 7.97e-06 |
| 256 | 2.51e-05 | 3.82e-06 | 5.61e-09 | 9.94e-04 | 4.84e-06 |
| 253 | 2.22e-05 | 2.76e-06 | 4.30e-09 | 8.12e-04 | 2.95e-06 |
| 250 | 1.98e-05 | 2.01e-06 | 3.31e-09 | 6.72e-04 | 1.79e-06 |
| 247 | 1.77e-05 | 1.47e-06 | 2.56e-09 | 5.62e-04 | 1.09e-06 |
| 244 | 1.60e-05 | 1.09e-06 | 1.99e-09 | 4.75e-04 | 6.64e-07 |
| 241 | 1.44e-05 | 8.07e-07 | 1.56e-09 | 4.06e-04 | 4.04e-07 |
| 239 | 1.31e-05 | 6.04e-07 | 1.22e-09 | 3.50e-04 | 2.46e-07 |
| 236 | 1.19e-05 | 4.55e-07 | 9.63e-10 | 3.05e-04 | 1.50e-07 |
| 233 | 1.09e-05 | 3.44e-07 | 7.63e-10 | 2.68e-04 | 9.11e-08 |
| 231 | 1.00e-05 | 2.63e-07 | 6.07e-10 | 2.37e-04 | 5.54e-08 |
| 228 | 9.25e-06 | 2.01e-07 | 4.85e-10 | 2.11e-04 | 3.38e-08 |
| 226 | 8.56e-06 | 1.55e-07 | 3.89e-10 | 1.90e-04 | 2.06e-08 |
| 223 | 7.94e-06 | 1.20e-07 | 3.13e-10 | 1.71e-04 | 1.25e-08 |
| 221 | 7.38e-06 | 9.40e-08 | 2.53e-10 | 1.56e-04 | 7.62e-09 |
| 219 | 6.89e-06 | 7.37e-08 | 2.05e-10 | 1.42e-04 | 4.64e-09 |
| 216 | 6.44e-06 | 5.81e-08 | 1.67e-10 | 1.31e-04 | 2.83e-09 |
| 214 | 6.04e-06 | 4.60e-08 | 1.37e-10 | 1.20e-04 | 1.72e-09 |
| 212 | 5.68e-06 | 3.66e-08 | 1.12e-10 | 1.12e-04 | 1.05e-09 |
| 210 | 5.35e-06 | 2.93e-08 | 9.21e-11 | 1.04e-04 | 6.39e-10 |
| 208 | 5.05e-06 | 2.35e-08 | 7.60e-11 | 9.69e-05 | 3.90e-10 |
| 206 | 4.77e-06 | 1.90e-08 | 6.29e-11 | 9.07e-05 | 2.37e-10 |
| 204 | 4.52e-06 | 1.54e-08 | 5.22e-11 | 8.53e-05 | 1.45e-10 |
| 202 | 4.29e-06 | 1.25e-08 | 4.34e-11 | 8.03e-05 | 8.82e-11 |
| 200 | 4.08e-06 | 1.02e-08 | 3.62e-11 | 7.59e-05 | 5.38e-11 |
